# Supplementary material for: Construction of Ni–Co alloy/zeolite nanosheet catalysts for the hydrodeoxygenation of fatty acids to alkanes
Source: Royal Society of Chemistry journal article supplement (doi:10.1039/d4qi02989e), 2025-01-01
Supplement: d4qi02989e1.pdf [file d4qi02989e1.pdf]

## Supporting Information

### **Construction of Ni-Co alloy/zeolite nanosheet catalysts for hydrodeoxygenation of fatty acid to alkanes**

Ge Tian,<sup>a</sup> Guangrui Chen,<sup>a,b</sup> Risheng Bai,<sup>a</sup> Guoju Yang,<sup>a</sup> Zhenheng Diao,<sup>a,c</sup> Buyuan Guan,<sup>\*,a,b</sup> and Jihong Yu<sup>\*,a,b</sup>

<sup>a</sup>State Key Laboratory of Inorganic Synthesis and Preparative Chemistry, College of Chemistry, Jilin University, Changchun 130012, People's Republic of China

<sup>b</sup>International Center of Future Science, Jilin University, Changchun 130012, People's Republic of China

<sup>c</sup>School of Chemical Engineering, Changchun University of Technology, Changchun 130012, People's Republic of China

\*Correspondence to: [guanbuyuan@jlu.edu.cn](mailto:guanbuyuan@jlu.edu.cn); [jihong@jlu.edu.cn](mailto:jihong@jlu.edu.cn)

## **Table of Contents**

**Section 1. Materials and Methods**

**Section 2. Characterizations**

**Section 3. Catalytic tests**

**Section 4. Additional figures and tables**

## Section 1. Materials and Methods

Tetraethylorthosilicate (TEOS, Tianjin Fuchen Chemical Reagents Company), tetrabutylammonium hydroxide solution (TBAOH, 40 wt % Aladdin), ammonia solution (25%–28%, Sinopharm Chemical Reagent Company), aluminium isopropoxide ( $\text{Al}(\text{C}_3\text{H}_7\text{O})_3$ , Tianjin Fuchen Chemical Reagents Company), nickel acetate ( $\text{Ni}(\text{CH}_3\text{COO})_2 \cdot 4\text{H}_2\text{O}$ , Sinopharm Chemical Reagent Company), ammonium chloride ( $\text{NH}_4\text{Cl}$ , Sinopharm Chemical Reagent Company), cobalt acetate ( $\text{Co}(\text{CH}_3\text{COO})_2 \cdot 4\text{H}_2\text{O}$ , Sinopharm Chemical Reagent Company), sodium hydroxide ( $\text{NaOH}$ , Sinopharm Chemical Reagent Company), ammonium nitrate ( $\text{NH}_4\text{NO}_3$ , Sinopharm Chemical Reagent Company), stearic acid (98%, Aladdin), dodecane (98%, Aladdin), Commercial ZSM-5 zeolite (Nankai Catalyst Corporation, China). All reagents were used without further purification. Deionized (DI) water was used in all experiments.

***Synthesis of self-pillared ZSM-5 zeolites.*** The self-pillared ZSM-5 was synthesized using tetrabutylammonium hydroxide as the structural directing agent, with the gel molar ratio of  $1\text{SiO}_2: 0.3 \text{TBAOH}: 0.01 \text{Al}(\text{C}_3\text{H}_7\text{O})_3: 0.0125 \text{NaOH}: 10 \text{H}_2\text{O}$ . Firstly, 12.4 g of TBAOH solution was mixed with 3 g of deionized water, then 122 mg of aluminum isopropoxide was added and stirred for 30 minutes. After that, 12 mg of NaOH and 12.48 g of TEOS were added and stirred for 4 hours until TEOS was completely hydrolyzed. Finally, the obtained solution was transferred into a 100 mL stainless steel autoclave and crystallized in a pre-heated oven at 80 °C for 1 day and then at 160 °C for 2 days. The as-synthesized solid product was centrifuged, washed with deionized water and ethanol several times, and then dried at 80 °C in the oven

overnight, followed by calcination at 550 °C in air for 6 hours to remove the organic template agent. Finally, the calcined zeolite was converted to the proton form via the ion exchange method. 1 g of calcined zeolite was added into 50 mL 1 M  $\text{NH}_4\text{NO}_3$  aqueous solution with continuous stirring at 80 °C for 4 hours. The solid product was centrifuged and washed with deionized water. The process was repeated three times, and the resulted solid product was calcined in air at 550 °C for 6 hours.

***Synthesis of ZSM-5@Ni-Co silicate.*** ZSM-5@Ni-Co silicate with the Ni/Co ratio of 0.62:0.38 was prepared through a simple hydrothermal process. Typically, 8.7 mg of  $\text{Ni}(\text{CH}_3\text{COO})_2 \cdot 4\text{H}_2\text{O}$ , 4.5 mg of  $\text{Co}(\text{CH}_3\text{COO})_2 \cdot 4\text{H}_2\text{O}$ , 56.1 mg of  $\text{NH}_4\text{Cl}$ , and 95.6 mg of  $\text{NH}_3 \cdot \text{H}_2\text{O}$  (28%) were added under stirring in 5.25 g of deionized water. Then 10 mg of the self-pillared ZSM-5 was added to the above solution and ultrasonicated for 30 min to form a uniform suspension, then the mixture was heated to 100 °C for 3 h. The resulting solid precipitate was collected, washed several times with deionized water and ethanol and dried at 80 °C in the oven for 4 hours. The ZSM-5@Ni-Co silicate with the Ni/Co ratio of 0.75:0.25 was synthesized using a similar experimental process as the ZSM-5@Ni-Co silicate with the Ni/Co ratio of 0.62:0.38 except involving the use of 8.7 mg of  $\text{Ni}(\text{CH}_3\text{COO})_2 \cdot 4\text{H}_2\text{O}$ , 2.25 mg of  $\text{Co}(\text{CH}_3\text{COO})_2 \cdot 4\text{H}_2\text{O}$ , 46.75 mg of  $\text{NH}_4\text{Cl}$ , 79.63 mg of  $\text{NH}_3 \cdot \text{H}_2\text{O}$ , and 4.375 g of deionized water.

***Synthesis of ZSM-5@Ni-Co/SiO<sub>2</sub>.*** ZSM-5@Ni-Co silicate was reduced under a  $\text{H}_2$  flow (flow

rate: 20 mL min<sup>-1</sup>) at 550 °C for 0.5 h with a heating rate of 5 °C min<sup>-1</sup>, and black power of ZSM-5@Ni-Co/SiO<sub>2</sub> was collected. The obtained catalysts were designated as ZSM-5@Ni<sub>0.62</sub>Co<sub>0.38</sub>/SiO<sub>2</sub> and ZSM-5@Ni<sub>0.75</sub>Co<sub>0.25</sub>/SiO<sub>2</sub> separately.

**Synthesis of commercial ZSM-5@Ni<sub>0.62</sub>Co<sub>0.38</sub>/SiO<sub>2</sub>.** Commercial ZSM-5@Ni<sub>0.62</sub>Co<sub>0.38</sub>/SiO<sub>2</sub> (C-ZSM-5@Ni<sub>0.62</sub>Co<sub>0.38</sub>/SiO<sub>2</sub>) was prepared using a similar experimental process as ZSM-5@Ni<sub>0.62</sub>Co<sub>0.38</sub>/SiO<sub>2</sub>, with the only difference being the substitution of self-pillared ZSM-5 zeolites with commercial ZSM-5 zeolites.

**Synthesis of ZSM-5@Ni<sub>3</sub>Si<sub>2</sub>O<sub>5</sub>(OH)<sub>4</sub>.** Typically, 8.7 mg of Ni(CH<sub>3</sub>COO)<sub>2</sub>·4H<sub>2</sub>O, 37.4 mg of NH<sub>4</sub>Cl, and 63.7 mg of NH<sub>3</sub>·H<sub>2</sub>O (28%) were added under stirring in 3.5 g of deionized water. Then 10 mg of the self-pillared ZSM-5 was added to the above solution and ultrasonicated for 30 min to form a uniform suspension, then the mixture was heated to 100 °C for 3 h. The resulting solid precipitate was collected, washed several times with deionized water and ethanol and dried at 80 °C in the oven for 4 hours.

**Synthesis of ZSM-5@Ni/SiO<sub>2</sub>.** ZSM-5@Ni<sub>3</sub>Si<sub>2</sub>O<sub>5</sub>(OH)<sub>4</sub> was reduced under a H<sub>2</sub> flow (flow rate: 20 mL min<sup>-1</sup>) at 550 °C for 0.5 h with a heating rate of 5 °C min<sup>-1</sup>, and black power of ZSM-5@Ni/SiO<sub>2</sub> was collected.

**Synthesis of ZSM-5@Co<sub>3</sub>Si<sub>2</sub>O<sub>5</sub>(OH)<sub>4</sub>.** ZSM-5@Co<sub>3</sub>Si<sub>2</sub>O<sub>5</sub>(OH)<sub>4</sub> was prepared under a similar

experimental process as ZSM-5@Ni<sub>3</sub>Si<sub>2</sub>O<sub>5</sub>(OH)<sub>4</sub>, with the only difference being the substitution of the Ni(CH<sub>3</sub>COO)<sub>2</sub>·4H<sub>2</sub>O with Co(CH<sub>3</sub>COO)<sub>2</sub>·4H<sub>2</sub>O.

**Synthesis of ZSM-5@Co/SiO<sub>2</sub>.** ZSM-5@Co<sub>3</sub>Si<sub>2</sub>O<sub>5</sub>(OH)<sub>4</sub> was reduced under a H<sub>2</sub> flow (flow rate: 20 mL min<sup>-1</sup>) at 550 °C for 0.5 h with a heating rate of 5 °C min<sup>-1</sup>, and black power of ZSM-5@Co/SiO<sub>2</sub> was collected.

## Section 2. Characterizations

The powder X-ray diffraction measurements were performed on a Rigaku D-Max 2550 diffractometer by using Cu K $\alpha$  radiation. Scanning electron microscopy images were measured with JEOL JSM-7800F. The transmission electron microscopy images and the elemental mappings were measured with a Tecnai F20 electron microscope. High resolution transmission electron microscopy (HRTEM) and energy dispersive spectrometer (EDS) mapping were performed on a JEOL JEM-2100F microscope. The H<sub>2</sub>-TPR measurements were measured on a Micromeritics AutoChem II 2920 instrument. Chemical compositions of samples were analyzed by Inductively Coupled Plasma-Optical Emission Spectrometry (ICP-OES) using iCAP 7000 Series. Nitrogen adsorption/desorption measurements were carried out on a Micromeritics ASAP 3-flex analyzer at 77 K after the samples were degassed at 350 °C under vacuum. XPS spectra of the catalysts were performed using a Thermo ESCALAB 250 spectrometer (Thermo Scientific, NY, USA). Fourier transform infrared (FTIR) spectra were recorded on a BRUKER vertex 80v; samples before testing were pelleted with KBr powder.

### Section 3. Catalytic tests

The deoxygenation reaction of stearic acid (SA) was carried out in a batch autoclave (CHEMN Instrument, 100 mL). In a typical run, 0.1 g of catalysts, 1 g of SA and 40 mL of dodecane were introduced into the batch autoclave. The autoclave was sealed and firstly purged with N<sub>2</sub> (30 bar) three times to remove the residual air, followed by filling it with the reaction gas H<sub>2</sub> (40 bar) at room temperature. The reaction was performed at 260 °C at a stirring speed of 1000 rpm. The liquid products were obtained by *in-situ* sampling every 20 min and analyzed by gas chromatography (GC, Agilent 7890B) equipped with HP-innowax column (30 m × 320 μm × 25 μm) and FID detector. The methyl heptadecanoate was used as a quantitative internal standard in GC measurement. The mass balance was above 98%.

The yield, conversion, and normalized rate were calculated based on the following equations:

The conversion (%) = mass of the converted SA (g)/mass of the starting SA (g) × 100% (By GC analysis) (Equation S1)

The selectivity (%) = mass of one product (g)/mass of all the products (g) × 100% (By GC analysis) (Equation S2)

The yield (%) = conversion × selectivity × 100% (Equation S3)

The reaction rate ( $\text{g}_{\text{SA}} \text{g}_{\text{cat}}^{-1} \text{h}^{-1}$ ) = mass of converted SA (g)/mass of catalyst (g)/reaction time (h) (Equation S4)





## Section 4. Additional figures and tables

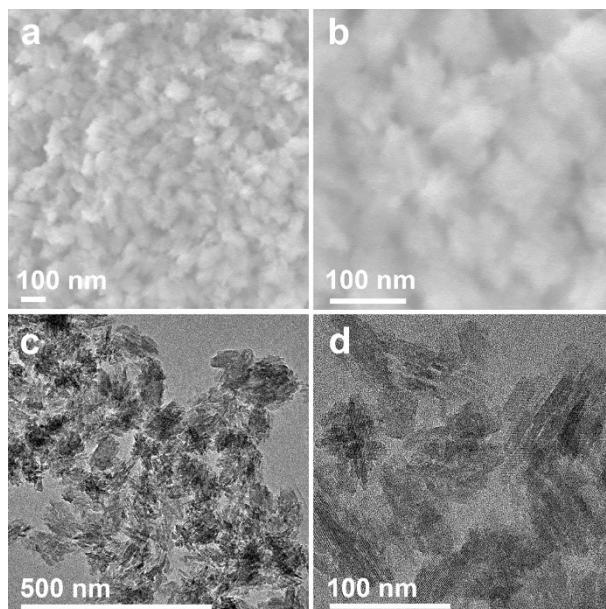

**Fig. S1** (a, b) SEM and (c, d) TEM images of ZSM-5 zeolites with self-pillared nanosheet morphology.

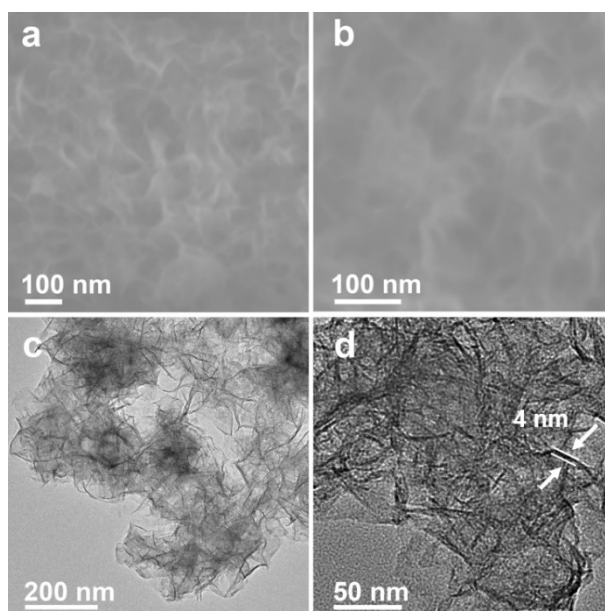

**Fig. S2** (a, b) SEM and (c, d) TEM images of ZSM-5@Ni-Co silicate with the Ni/Co ratio of 0.62:0.38.

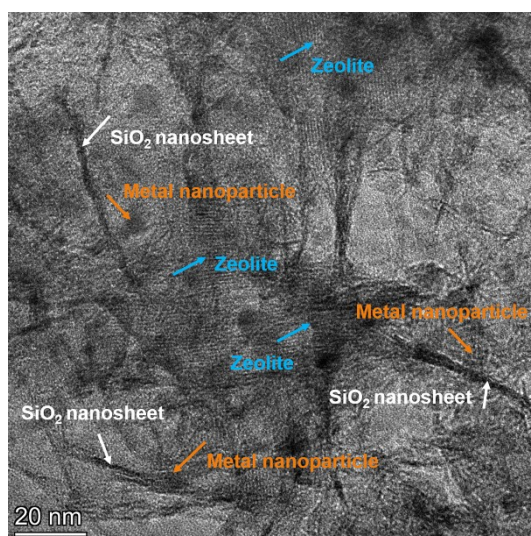

**Fig. S3** TEM image of ZSM-5@Ni<sub>0.62</sub>Co<sub>0.38</sub>/SiO<sub>2</sub> catalysts.

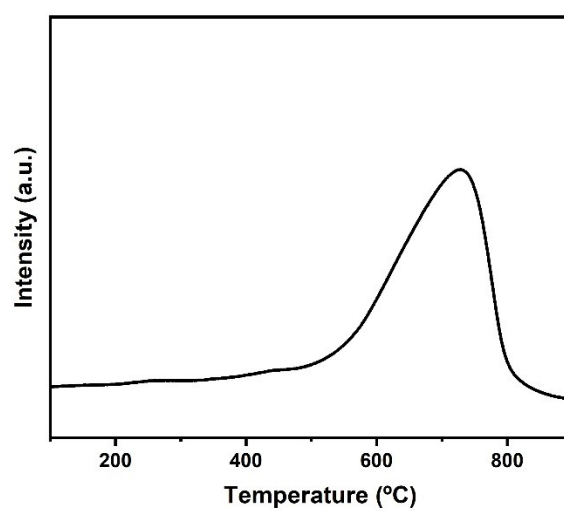

**Fig. S4** H<sub>2</sub>-TPR profile of ZSM-5@Ni-Co silicate with the Ni/Co ratio of 0.62:0.38.

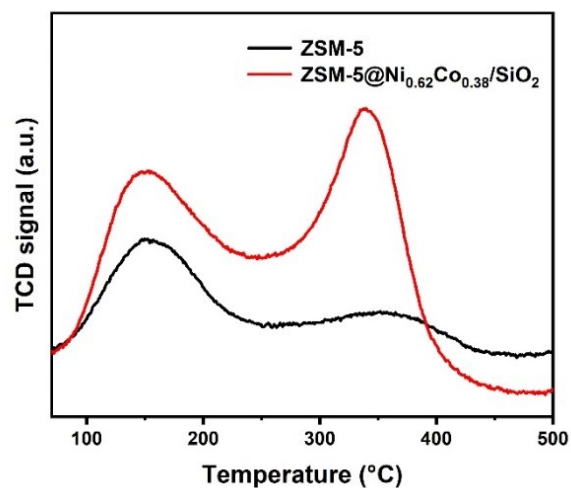

**Fig. S5**  $\text{NH}_3$ -TPD profiles of ZSM-5 and ZSM-5@Ni<sub>0.62</sub>Co<sub>0.38</sub>/SiO<sub>2</sub>.

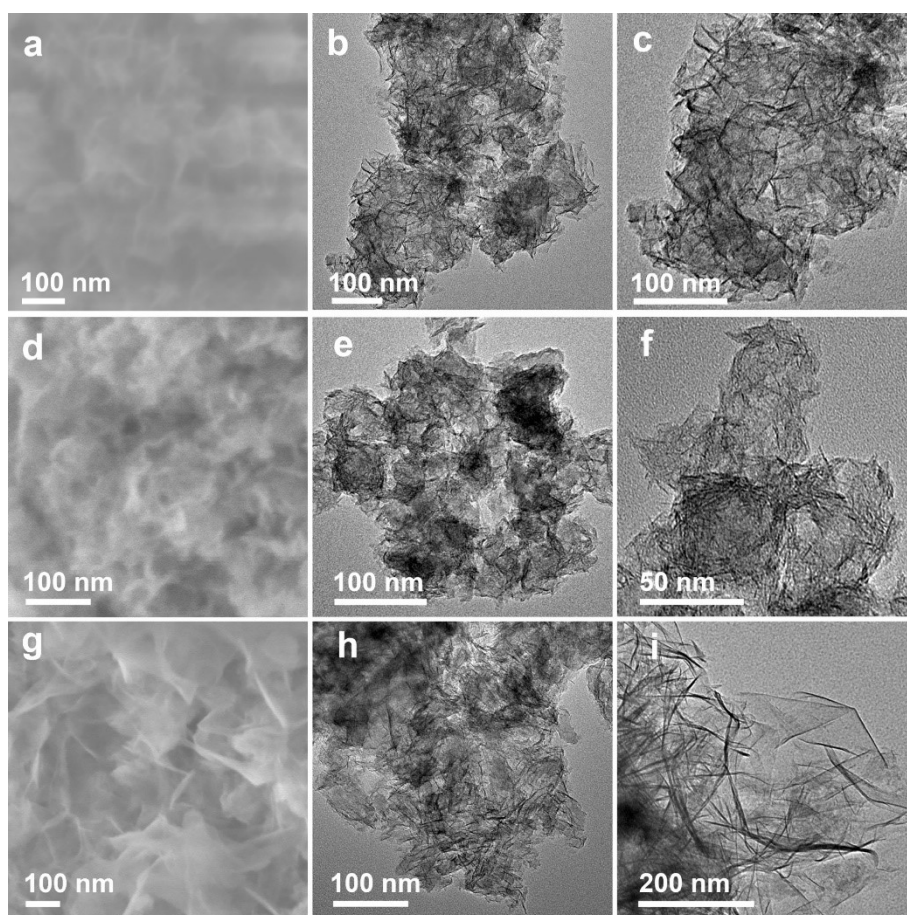

**Fig. S6** (a, d, g) SEM and (b, c, e, f, h, i) TEM images of (a–c) ZSM-5@Ni-Co silicate with the Ni/Co ratio of 0.75:0.25, (d–f) ZSM-5@Ni<sub>3</sub>Si<sub>2</sub>O<sub>5</sub>(OH)<sub>4</sub>, and (g–i) ZSM-5@Co<sub>3</sub>Si<sub>2</sub>O<sub>5</sub>(OH)<sub>4</sub>.

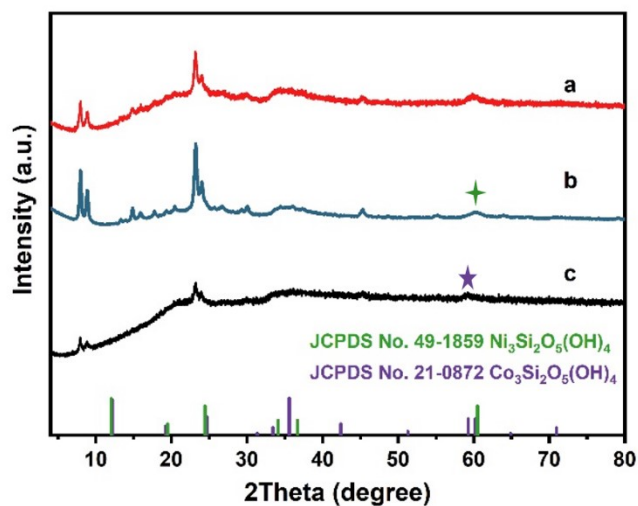

**Fig. S7** XRD patterns of (a) ZSM-5@Ni-Co silicate with the Ni/Co ratio of 0.75:0.25, (b) ZSM-5@Ni<sub>3</sub>Si<sub>2</sub>O<sub>5</sub>(OH)<sub>4</sub>, and (c) ZSM-5@Co<sub>3</sub>Si<sub>2</sub>O<sub>5</sub>(OH)<sub>4</sub>.

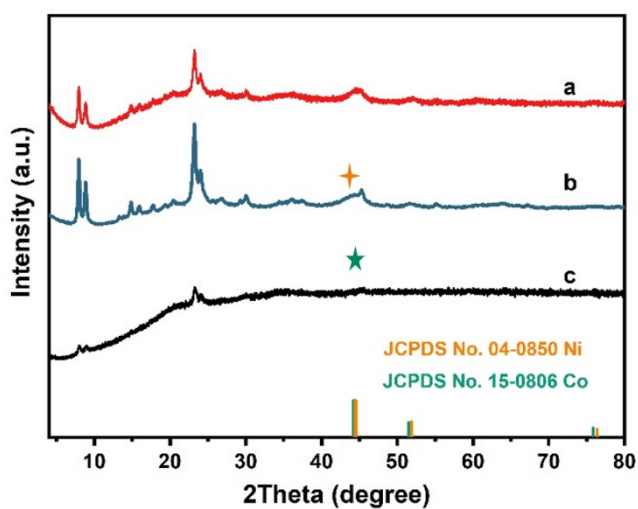

**Fig. S8** XRD patterns of (a) ZSM-5@Ni<sub>0.75</sub>Co<sub>0.25</sub>/SiO<sub>2</sub>, (b) ZSM-5@Ni/SiO<sub>2</sub>, and (c) ZSM-5@Co/SiO<sub>2</sub>.

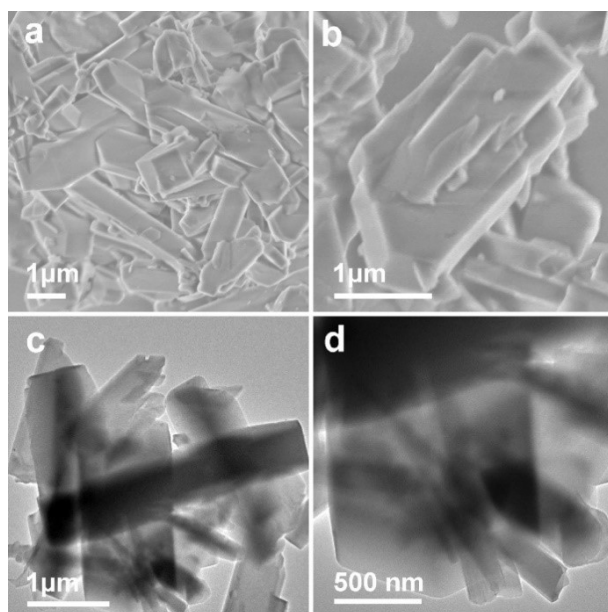

**Fig. S9** (a, b) SEM and (c, d) TEM images of commercial ZSM-5 zeolites.

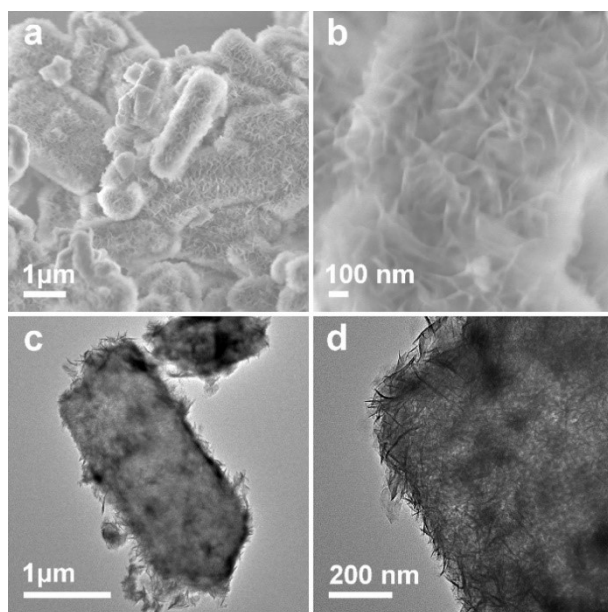

**Fig. S10** (a, b) SEM and (c, d) TEM images of C-ZSM-5@Ni-Co silicate with the Ni/Co ratio of 0.62:0.38.

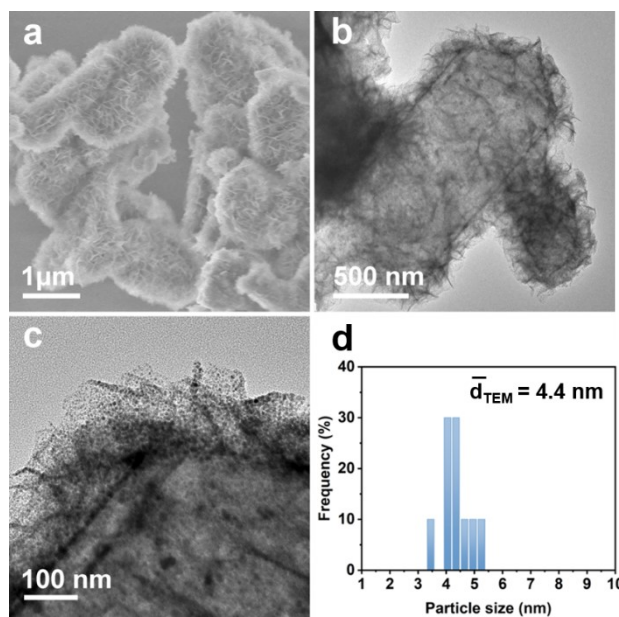

**Fig. S11** (a) SEM image, (b, c) TEM images of C-ZSM-5@Ni<sub>0.62</sub>Co<sub>0.38</sub>/SiO<sub>2</sub>, and (d) the corresponding size distribution of Ni-Co alloy nanoparticles.

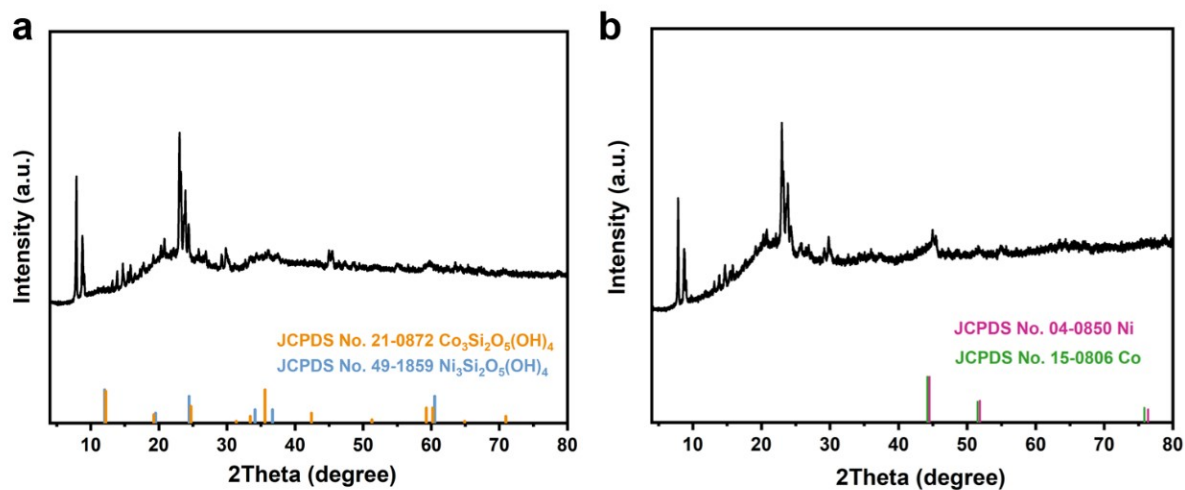

**Fig. S12** XRD patterns of (a) C-ZSM-5@Ni-Co silicate with the Ni/Co ratio of 0.62:0.38 and (b) C-ZSM-5@Ni<sub>0.62</sub>Co<sub>0.38</sub>/SiO<sub>2</sub>.

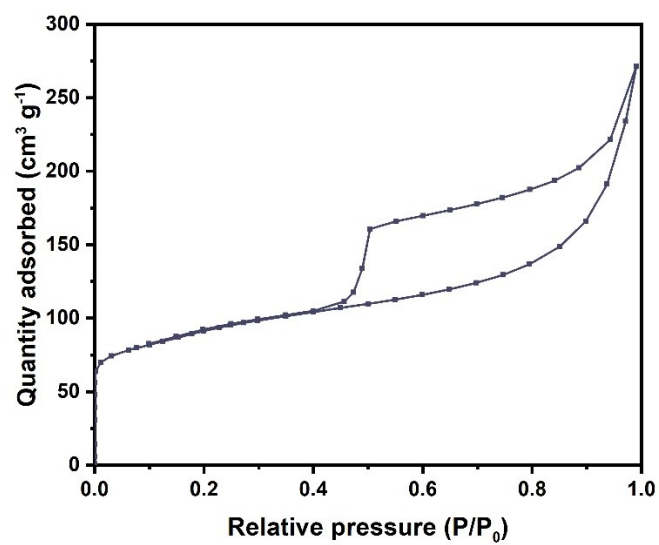

Fig. S13 N<sub>2</sub> adsorption-desorption isotherms of C-ZSM-5@Ni<sub>0.62</sub>Co<sub>0.38</sub>/SiO<sub>2</sub>.

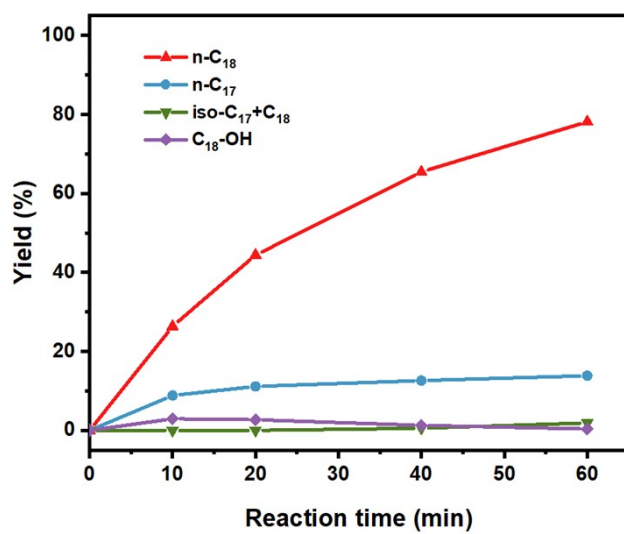

Fig. S14 Time-dependent product yields with ZSM-5@Ni<sub>0.75</sub>Co<sub>0.25</sub>/SiO<sub>2</sub> catalysts.

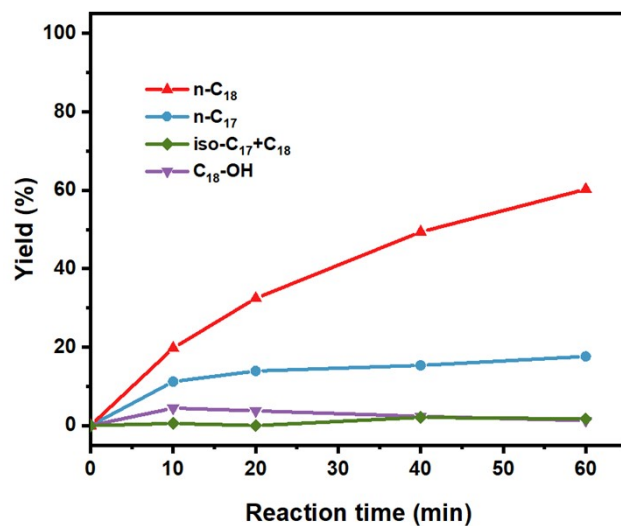

**Fig. S15** Time-dependent product yields with ZSM-5@Ni/SiO<sub>2</sub> catalysts.

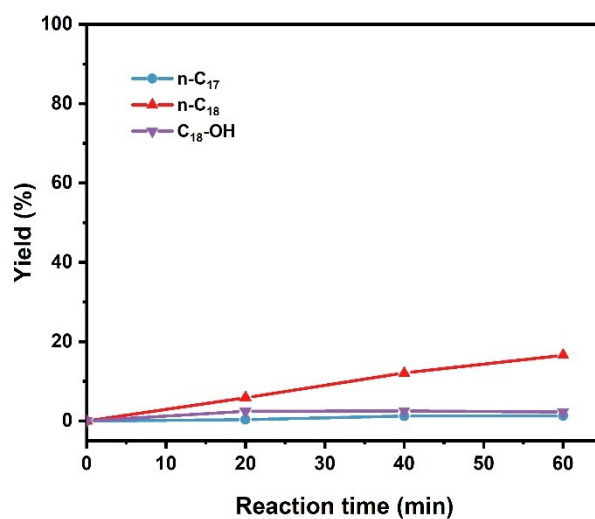

**Fig. S16** Time-dependent product yields with ZSM-5@Co/SiO<sub>2</sub> catalysts.



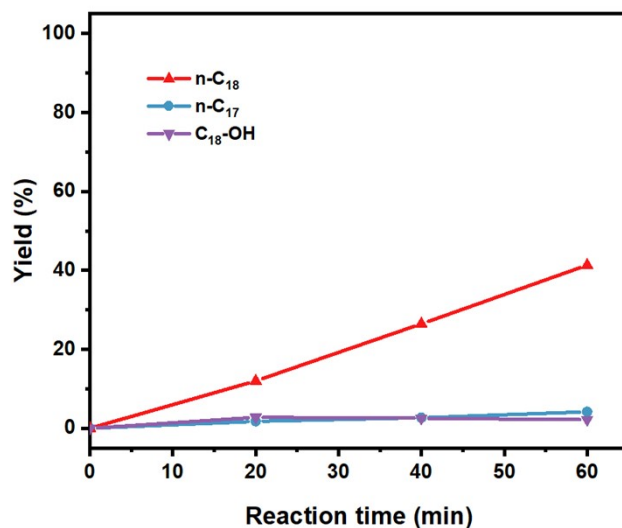

**Fig. S17** Time-dependent product yields with C-ZSM-5@Ni<sub>0.62</sub>Co<sub>0.38</sub>/SiO<sub>2</sub> catalysts.

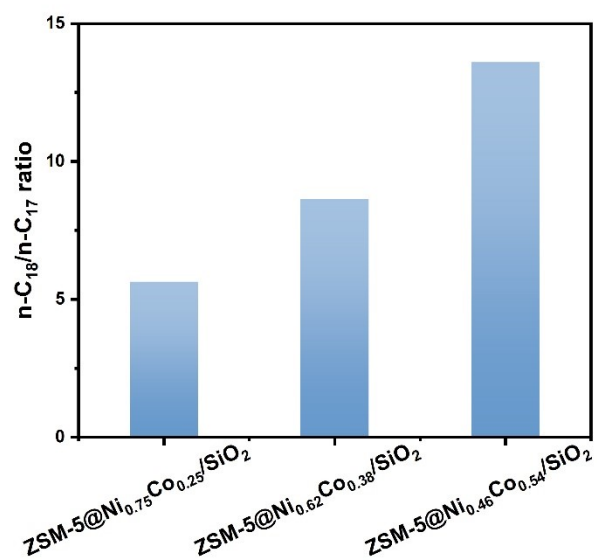

**Fig. S18** The ratio of n-C<sub>18</sub>/n-C<sub>17</sub> in the product over different ZSM-5@Ni-Co alloy/SiO<sub>2</sub> catalysts.

**Table S1.** The textural properties of the various samples.

| Sample                                                          | $S_{\text{BET}}^a$<br>(m <sup>2</sup> /g) | $S_{\text{micro}}^b$<br>(m <sup>2</sup> /g) | $S_{\text{ext}}^b$<br>(m <sup>2</sup> /g) | $V_{\text{micro}}^b$<br>(cm <sup>3</sup> /g) | $V_{\text{total}}^c$<br>(cm <sup>3</sup> /g) | $V_{\text{meso}}^d$<br>(cm <sup>3</sup> /g) |
|-----------------------------------------------------------------|-------------------------------------------|---------------------------------------------|-------------------------------------------|----------------------------------------------|----------------------------------------------|---------------------------------------------|
| ZSM-5                                                           | 464                                       | 359                                         | 105                                       | 0.14                                         | 0.72                                         | 0.58                                        |
| ZSM-5@Ni-Co silicate                                            | 477                                       | 175                                         | 302                                       | 0.07                                         | 0.67                                         | 0.60                                        |
| ZSM-5@Ni <sub>0.62</sub> Co <sub>0.38</sub> /SiO <sub>2</sub>   | 448                                       | 162                                         | 286                                       | 0.07                                         | 0.66                                         | 0.59                                        |
| C-ZSM-5@Ni <sub>0.62</sub> Co <sub>0.38</sub> /SiO <sub>2</sub> | 323                                       | 214                                         | 109                                       | 0.10                                         | 0.42                                         | 0.32                                        |

<sup>a</sup> Specific surface area calculated from the nitrogen adsorption isotherm using the BET method. <sup>b</sup>  $S_{\text{micro}}$  (micropore area),  $S_{\text{ext}}$  (external surface area), and  $V_{\text{micro}}$  (micropore volume) calculated using the t-plot method. <sup>c</sup> Total pore volume at  $P/P_0 = 0.99$ . <sup>d</sup>  $V_{\text{meso}} = V_{\text{total}} - V_{\text{micro}}$ .

**Table S2.** Comparisons of catalytic activities for hydrodeoxygenation of fatty acids over literature reported catalysts with this work.

| Catalyst                                                      | Metal loading (wt%) | Reaction composition <sup>a</sup> | Reaction conditions                  | Time (min) | Con. (%) | Rate (g g <sub>cat</sub> <sup>-1</sup> h <sup>-1</sup> ) | HDO/DCO <sub>x</sub> <sup>b</sup> | Ref.      |
|---------------------------------------------------------------|---------------------|-----------------------------------|--------------------------------------|------------|----------|----------------------------------------------------------|-----------------------------------|-----------|
| ZSM-5@Ni <sub>0.62</sub> Co <sub>0.38</sub> /SiO <sub>2</sub> | 22.6                | 10/1                              | T=260 °C<br>P=4.0 MPa H <sub>2</sub> | 50         | 100      | 12                                                       | 8.63                              | This work |
| Ni/Co-S                                                       | 4                   | 3/5                               | T=290 °C<br>P=4.0 MPa H <sub>2</sub> | 180        | 99.0     | 0.20                                                     | 12.3                              | 1         |
| Co <sub>x</sub> Ni <sub>1-x</sub> P/SiO <sub>2</sub>          | 10                  | 50/3                              | T=320 °C<br>P=2.0 MPa H <sub>2</sub> | 240        | 96.9     | 4.0                                                      | 0.06                              | 2         |
| NiCo/SiO <sub>2</sub>                                         | 20                  | 5/3                               | T=280 °C<br>P=1.0 MPa H <sub>2</sub> | 180        | 83.0     | 0.46                                                     | mainly DCO                        | 3         |
| NiCo/C-Na                                                     | 20                  | 5/3                               | T=280 °C<br>P=1.0 MPa H <sub>2</sub> | 180        | 100      | 0.55                                                     | mainly DCO                        | 4         |

<sup>a</sup> The reaction composition refers to the mass ratio of the substrate to the catalyst in the reaction slurry.

<sup>b</sup> HDO/DCO<sub>x</sub> was calculated based on (selectivity of hydrodeoxygenation (HDO) products)/(selectivity of decarboxylation (DCO) or decarbonylation (DCO<sub>2</sub>) products).

## Reference

1. D. Zheng, D. Guo, Z. Wang, X. Wang, Y. Shan, X. Liu, Z. Yan, S. Yu and Y. Liu, Synergistic effect of CoO<sub>x</sub> and Ni-Co alloy in Ni-Co/SAPO-11 catalysts for the deoxygenation of stearic acids, *Chem. Eng. J.*, 2023, **451**, 138929.
2. Z. Zhang, G. Bi, H. Zhang, A. Zhang, X. Li and J. Xie, Highly active and selective hydrodeoxygenation of oleic acid to second generation bio-diesel over SiO<sub>2</sub>-supported Co<sub>x</sub>Ni<sub>1-x</sub>P catalysts, *Fuel*, 2019, **247**, 26-35.
3. H. Lin, Y. Chu, M. Xie, L. Yang and G. Ouyang, NiCo/SiO<sub>2</sub> nanospheres for efficient synergetic decarboxylation of fatty acids and upgrading of municipal sludge HTL bio-crude to biofuels, *J. Environ. Chem. Eng.*, 2023, **11**, 110825.
4. H. Lin, F. Liao, Y. Chu, M. Xie, L. Pan, Y. Wang, L. Leng, D. Xu, L. Yang and G. Ouyang, Hierarchical porous honeycomb NiCo/C catalyst for decarboxylation of fatty acids and upgrading of sludge bio-crude, *Chem. Eng. Sci.*, 2024, **284**, 119439.
